# Supplementary material for: Controllable growth of uniform carbon nanotubes/carbon nanofibers on the surface of carbon fibers
Source: Royal Society of Chemistry journal article supplement (doi:10.1039/c5ra15556h), 2015-01-01
Supplement: c5ra15556h1.pdf [file c5ra15556h1.pdf]

S1a:

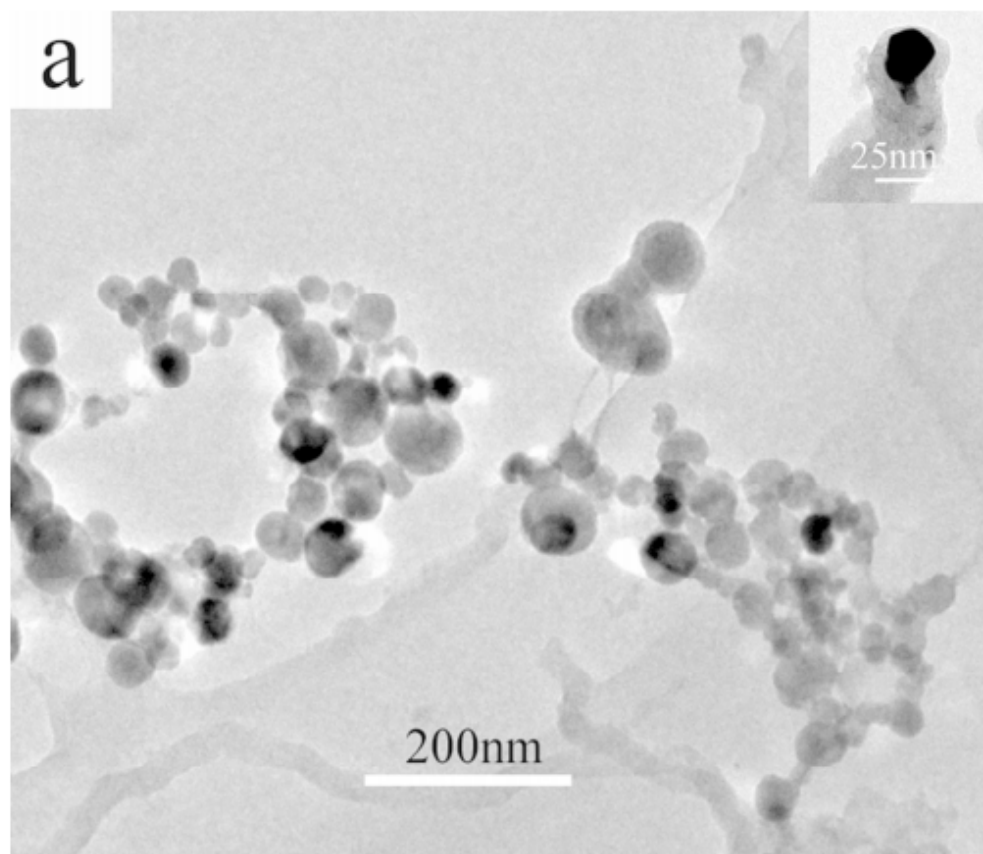

TEM images of catalyst particles after the CVD process performed at 500 °C with Ni used as catalyst  
70x60mm (300 x 300 DPI)

S1b:

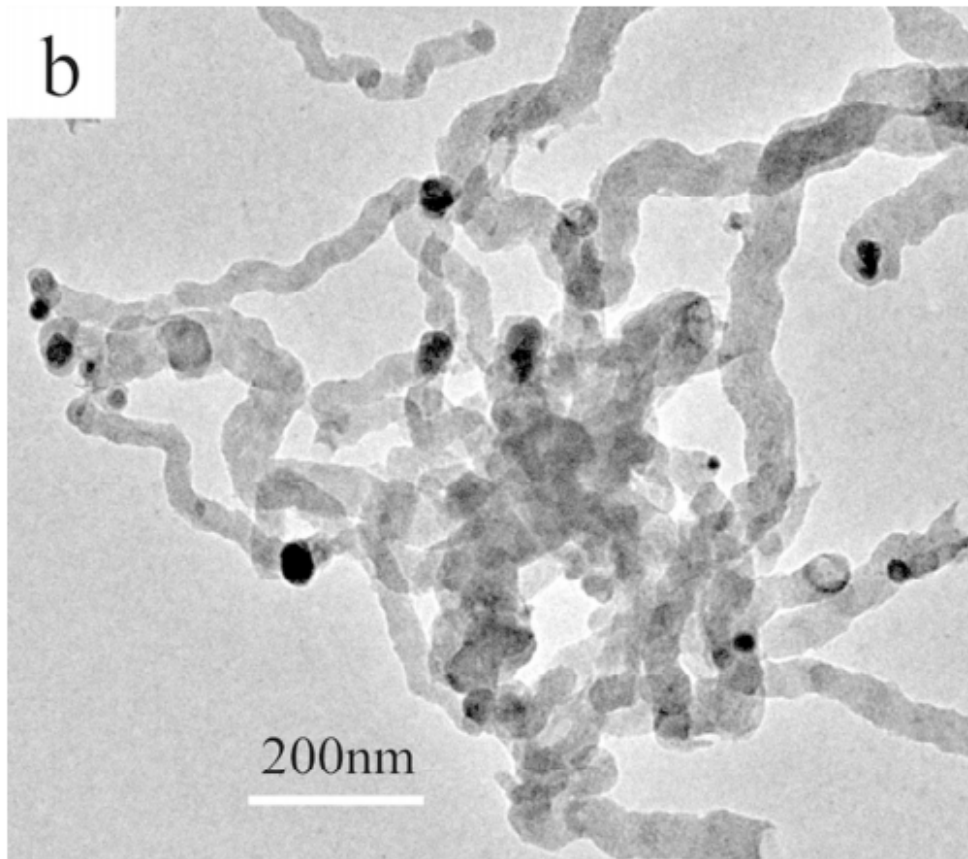

TEM images of catalyst particles after the CVD process performed at 500 °C with Fe used as catalyst  
70x61mm (300 x 300 DPI)

S1c:

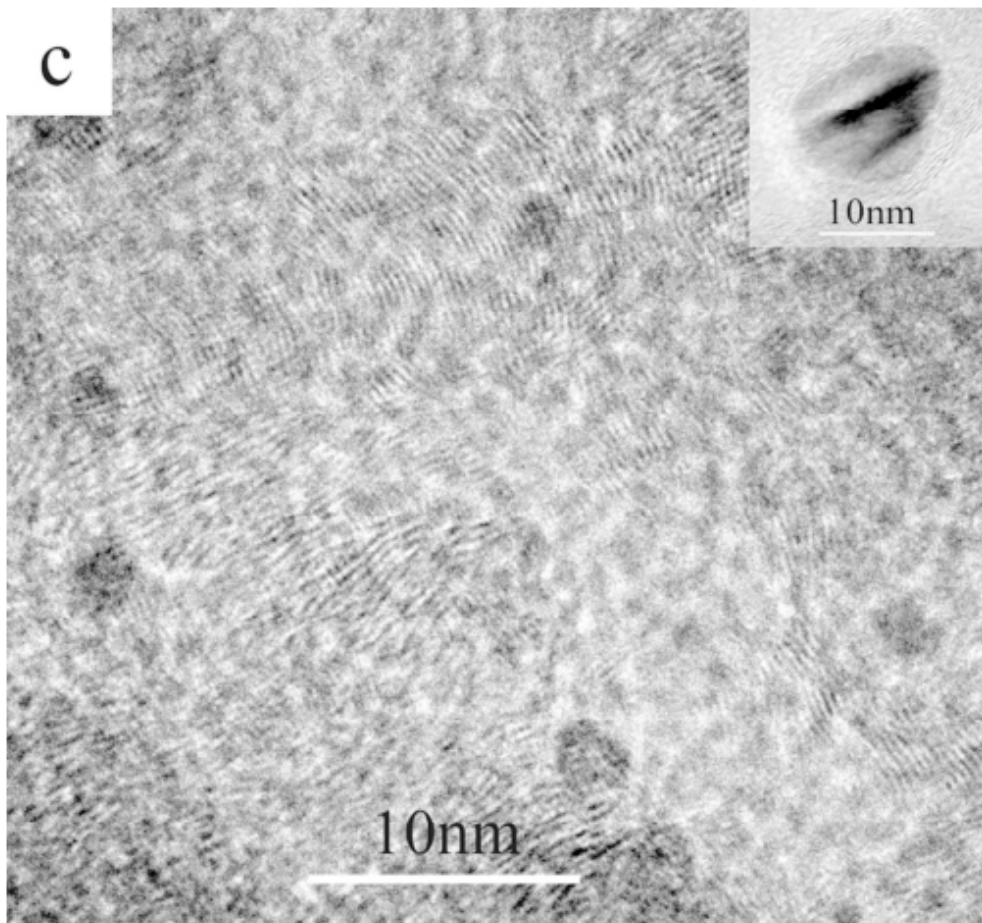

TEM images of catalyst particles after the CVD process performed at 600 °C with Ni used as catalyst  
70x65mm (300 x 300 DPI)

S2:

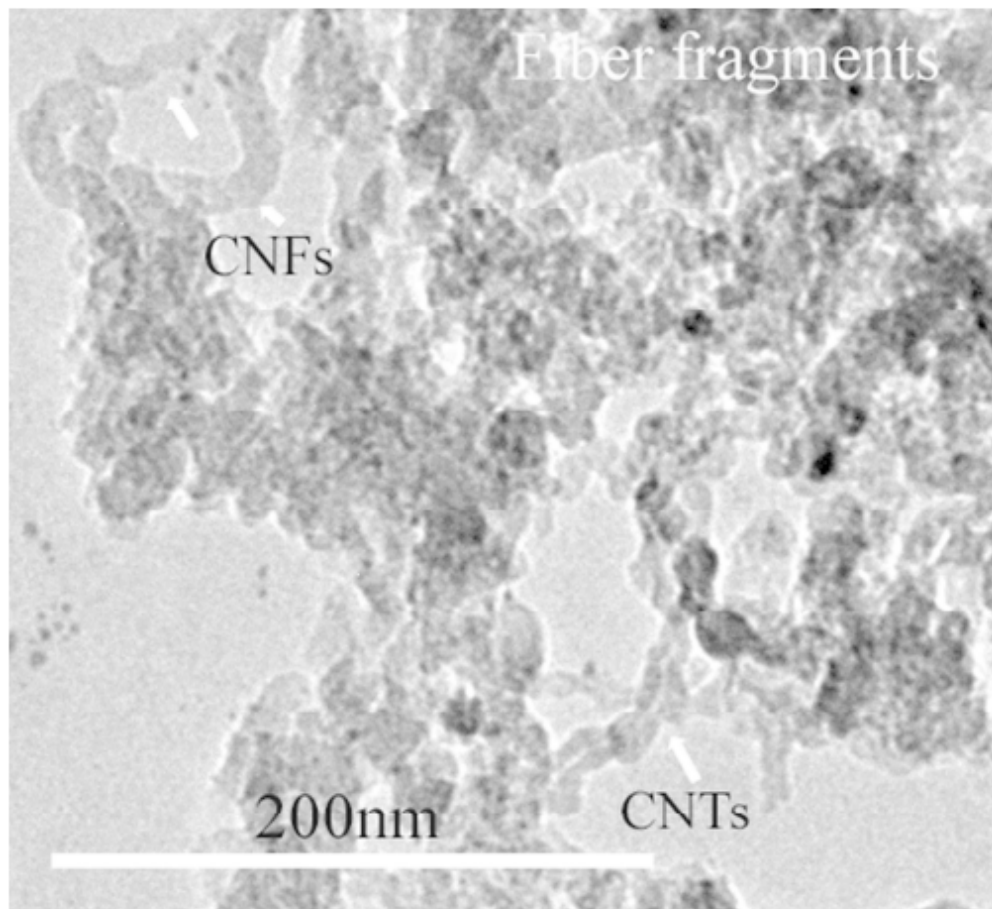

TEM images of final carbon products synthesized on carbon fibers at 550 °C with Ni used as catalyst  
70x63mm (300 x 300 DPI)
